# Supplementary material
Source: MDPI journal article supplement (https://www.mdpi.com/2311-7524/7/10/376)
Supplement: s1 [file s1]

**Table S1.** Experimental materials (130 genotypes) with estimated parameters

| <b>Genotypes</b>  | <b>Abbreviate form</b> | <b>DFF</b> | <b>FD</b> | <b>FL</b> | <b>FW</b> | <b>NDVI</b> | <b>PH</b> | <b>SLA</b> | <b>SPAD</b> | <b>TF</b> | <b>YPP</b> |
|-------------------|------------------------|------------|-----------|-----------|-----------|-------------|-----------|------------|-------------|-----------|------------|
| AC-285            | G1                     | 109.07     | 61.34     | 6.13      | 9.93      | 0.51        | 108.82    | 132.4      | 46.75       | 15.21     | 7.83       |
| BARI-1            | G2                     | 99.32      | 40.97     | 4.1       | 8.3       | 0.48        | 89.82     | 121.08     | 45.59       | 21.96     | 11.13      |
| BARI-10           | G3                     | 95.32      | 38.47     | 3.85      | 9.5       | 0.6         | 103.82    | 119.16     | 62.32       | 14.96     | 5.72       |
| BARI-4            | G4                     | 98.32      | 44.96     | 4.5       | 8         | 0.58        | 93.82     | 159.86     | 63.09       | 29.96     | 14.54      |
| BARI-5            | G5                     | 93.82      | 57.79     | 5.78      | 8.2       | 0.56        | 94.07     | 111.21     | 39.09       | 13.71     | 7.67       |
| BARI-5.1          | G6                     | 97.32      | 42.07     | 4.21      | 7.82      | 0.5         | 97.82     | 90.05      | 52.51       | 16.96     | 7.66       |
| BARI-6            | G7                     | 99.32      | 69.99     | 7         | 10.58     | 0.55        | 90.82     | 103.26     | 53.2        | 13.96     | 7.1        |
| BARI-8            | G8                     | 99.32      | 50.29     | 5.03      | 8.5       | 0.47        | 97.82     | 161.28     | 47.14       | 15.96     | 7.53       |
| BARI-8.1          | G9                     | 98.07      | 26.15     | 2.62      | 3.77      | 0.68        | 92.32     | 113.09     | 57.4        | 12.96     | 4.06       |
| BD-2646           | G10                    | 98.07      | 40.18     | 4.02      | 7.1       | 0.46        | 98.32     | 169.52     | 43.63       | 13.96     | 7.56       |
| BD-2649           | G11                    | 104.07     | 82.16     | 8.22      | 12.35     | 0.47        | 96.82     | 221.29     | 39.97       | 15.21     | 9.03       |
| BD-2682           | G12                    | 109.07     | 42.33     | 4.23      | 6.55      | 0.43        | 96.82     | 180.74     | 43.5        | 19.21     | 8.18       |
| BD-2724           | G13                    | 98.07      | 43.38     | 4.34      | 6.37      | 0.41        | 103.32    | 107.99     | 55.03       | 13.96     | 7.71       |
| BD-2749           | G14                    | 111.07     | 34.25     | 3.42      | 4.65      | 0.63        | 90.82     | 118.2      | 55.29       | 17.21     | 7.9        |
| BARI-Bt brinjal-1 | G15                    | 96.14      | 32.72     | 3.27      | 4.86      | 0.55        | 97.71     | 98.39      | 58.84       | 18.14     | 7.99       |
| BARI-Bt brinjal-2 | G16                    | 95.43      | 36.6      | 3.66      | 6.62      | 0.49        | 99.71     | 100.26     | 55.67       | 22.43     | 7.6        |
| BARI-Bt brinjal-3 | G17                    | 105.71     | 43.68     | 4.37      | 8.11      | 0.5         | 100.14    | 96.57      | 45.75       | 14.57     | 7.24       |
| BARI-Bt brinjal-4 | G18                    | 97         | 53.56     | 5.36      | 11.11     | 0.48        | 96.71     | 104.05     | 50.19       | 12.71     | 7.24       |
| Har-1             | G19                    | 98.07      | 31.75     | 3.18      | 3.96      | 0.62        | 114.32    | 143.29     | 42.59       | 12.96     | 5.88       |
| Hathazari-1       | G20                    | 116.07     | 32.26     | 3.23      | 4.61      | 0.53        | 109.32    | 162.78     | 49.21       | 13.96     | 6.58       |
| Hathazari-2       | G21                    | 116.07     | 31.18     | 3.12      | 4.87      | 0.44        | 105.32    | 125.17     | 52.37       | 12.96     | 6.76       |
| K-12              | G22                    | 112.07     | 76.35     | 7.63      | 11.56     | 0.41        | 113.82    | 144.01     | 49.89       | 14.21     | 8.29       |
| K-18              | G23                    | 113.07     | 52.15     | 5.21      | 9.9       | 0.54        | 105.82    | 156.14     | 44.17       | 13.21     | 5.75       |
| K-20              | G24                    | 108.07     | 46.22     | 4.62      | 6.51      | 0.53        | 119.82    | 129.93     | 35.33       | 14.21     | 6.76       |
| K-28              | G25                    | 97.07      | 44.21     | 4.42      | 8.6       | 0.42        | 116.82    | 151.13     | 47.91       | 16.21     | 8.19       |
| K-30              | G26                    | 96.07      | 29.94     | 2.99      | 3.89      | 0.5         | 133.82    | 192.09     | 38.37       | 13.21     | 3.98       |
| K-47              | G27                    | 97.07      | 51.18     | 5.12      | 8.96      | 0.53        | 126.82    | 157.13     | 43.93       | 13.21     | 6.3        |
| MRI-100           | G28                    | 109.57     | 70.05     | 7         | 8.89      | 0.49        | 104.82    | 99.38      | 53.63       | 20.71     | 1.66       |
| MRI-101           | G29                    | 98.57      | 67.35     | 6.73      | 8.3       | 0.49        | 110.82    | 191.45     | 37.13       | 19.71     | 13.23      |
| MRI-102           | G30                    | 98.57      | 46.15     | 4.61      | 8.3       | 0.53        | 110.82    | 112.75     | 43.41       | 18.71     | 7.58       |
| MRI-103           | G31                    | 96.57      | 50.07     | 5.01      | 8.01      | 0.55        | 115.82    | 179.06     | 48.99       | 16.71     | 8.94       |
| MRI-104           | G32                    | 97.57      | 45.94     | 4.59      | 6.22      | 0.59        | 103.82    | 185.49     | 48.55       | 15.71     | 6.28       |
| MRI-105           | G33                    | 85.57      | 54.13     | 5.41      | 7.99      | 0.66        | 94.82     | 121.4      | 50.65       | 21.71     | 10.16      |

| <b>Genotypes</b> | <b>Abbreviate<br/>form</b> | <b>DFF</b> | <b>FD</b> | <b>FL</b> | <b>FW</b> | <b>NDVI</b> | <b>PH</b> | <b>SLA</b> | <b>SPAD</b> | <b>TF</b> | <b>YPP</b> |
|------------------|----------------------------|------------|-----------|-----------|-----------|-------------|-----------|------------|-------------|-----------|------------|
| MRI-106          | G34                        | 94.57      | 35.94     | 3.59      | 5.6       | 0.56        | 87.82     | 139.06     | 66.97       | 17.71     | 7.79       |
| MRI-107          | G35                        | 93.57      | 47.52     | 4.75      | 8         | 0.61        | 100.82    | 107.42     | 38.95       | 14.71     | 8.35       |
| MRI-108          | G36                        | 89.57      | 49.12     | 4.91      | 8.66      | 0.59        | 114.82    | 99.54      | 48.03       | 18.71     | 9.11       |
| MRI-109          | G37                        | 97.57      | 70.18     | 7.02      | 10.3      | 0.66        | 130.82    | 100.36     | 32.47       | 25.71     | 12.46      |
| MRI-110          | G38                        | 95.57      | 62.96     | 6.3       | 11.63     | 0.64        | 102.82    | 181.38     | 41.32       | 27.71     | 13.16      |
| MRI-111          | G39                        | 86.57      | 84.88     | 8.49      | 9.32      | 0.58        | 98.82     | 129.56     | 37.9        | 20.71     | 9.62       |
| MRI-112          | G40                        | 86.57      | 56.09     | 5.61      | 9.02      | 0.54        | 110.82    | 191.25     | 44.99       | 18.71     | 9.06       |
| MRI-113          | G41                        | 87.32      | 32.01     | 3.2       | 6.35      | 0.62        | 131.57    | 143.46     | 44.06       | 24.21     | 17.07      |
| MRI-114          | G42                        | 87.32      | 36.26     | 3.63      | 6.91      | 0.58        | 110.57    | 128.32     | 50.9        | 17.21     | 11.46      |
| MRI-115          | G43                        | 104.32     | 33.06     | 3.31      | 6.11      | 0.73        | 130.57    | 193.62     | 37.28       | 28.21     | 20.57      |
| MRI-116          | G44                        | 86.32      | 29.38     | 2.94      | 4.29      | 0.62        | 128.57    | 151.5      | 56.07       | 30.21     | 9.75       |
| MRI-118          | G45                        | 83.32      | 22.22     | 2.22      | 4.53      | 0.57        | 110.57    | 97.82      | 43.65       | 26.21     | 10.94      |
| MRI-119          | G46                        | 85.32      | 22.99     | 2.3       | 3.47      | 0.42        | 122.57    | 120.04     | 49.17       | 16.21     | 5.71       |
| MRI-120          | G47                        | 87.32      | 34.04     | 3.4       | 4.37      | 0.74        | 120.57    | 136.91     | 39.16       | 18.21     | 6.51       |
| MRI-121          | G48                        | 87.32      | 29.79     | 2.98      | 5.11      | 0.75        | 126.57    | 103.52     | 47.04       | 17.21     | 6.79       |
| MRI-122          | G49                        | 85.32      | 32        | 3.2       | 5.45      | 0.72        | 132.57    | 178.32     | 53.56       | 23.21     | 11.1       |
| MRI-123          | G50                        | 83.32      | 29.11     | 2.91      | 3.95      | 0.61        | 112.57    | 136.82     | 48.47       | 21.21     | 9.99       |
| MRI-124          | G51                        | 87.32      | 22.97     | 2.3       | 3.41      | 0.65        | 124.57    | 118.05     | 49.9        | 18.21     | 6.87       |
| MRI-22           | G52                        | 105.57     | 56.23     | 5.62      | 7.4       | 0.6         | 99.82     | 101.84     | 61.14       | 13.71     | 5.87       |
| N-144            | G53                        | 104.82     | 62.56     | 6.26      | 12.38     | 0.62        | 106.57    | 144.98     | 48.05       | 49.21     | 0.34       |
| N-215            | G54                        | 87.32      | 46        | 4.6       | 8.83      | 0.62        | 115.57    | 127.86     | 45.66       | 14.21     | 13.35      |
| N-216            | G55                        | 106.32     | 35.99     | 3.6       | 8.26      | 0.33        | 121.57    | 186.5      | 52.06       | 15.21     | 9.75       |
| N-217            | G56                        | 104.82     | 68.52     | 6.85      | 8.04      | 0.5         | 115.57    | 132.43     | 30.04       | 14.21     | 6.97       |
| N-218            | G57                        | 105.82     | 52.56     | 5.26      | 6.41      | 0.57        | 115.57    | 163.15     | 44.08       | 12.21     | 4.05       |
| N-234            | G58                        | 111.82     | 25.99     | 2.6       | 5.43      | 0.65        | 110.57    | 109.3      | 48.41       | 13.21     | 4.84       |
| N-235            | G59                        | 117.07     | 24.22     | 2.42      | 4.07      | 0.49        | 129.32    | 118.51     | 51.8        | 33.96     | 11.03      |
| N-235.1          | G60                        | 110.82     | 11.39     | 1.14      | 3.76      | 0.55        | 120.57    | 128.67     | 54.55       | 31.21     | 1.32       |
| N-236            | G61                        | 91.82      | 42.6      | 4.26      | 7.96      | 0.62        | 139.57    | 99.24      | 42.49       | 15.21     | 8.97       |
| N-236.1          | G62                        | 121.07     | 33.28     | 3.33      | 6.18      | 0.7         | 107.32    | 112.66     | 48.55       | 12.96     | 6.76       |
| N-237            | G63                        | 122.07     | 30.07     | 3.01      | 3.97      | 0.53        | 115.32    | 202.84     | 46.45       | 21.96     | 6.6        |
| NRI-130          | G64                        | 102.32     | 55.19     | 5.52      | 9.11      | 0.48        | 120.57    | 162.58     | 51.57       | 11.21     | 10.65      |
| NRI-221          | G65                        | 87.32      | 42.02     | 4.2       | 6.83      | 0.64        | 120.57    | 108.44     | 39.07       | 18.21     | 7.05       |
| NRI-231          | G66                        | 86.32      | 52.2      | 5.22      | 7.78      | 0.6         | 121.57    | 97.04      | 47.66       | 19.21     | 8.35       |
| NRI-232          | G67                        | 87.32      | 45.3      | 4.53      | 6.18      | 0.54        | 118.57    | 141.48     | 42.5        | 20.21     | 6.75       |
| NRI-291          | G68                        | 105.32     | 62.99     | 6.3       | 8.52      | 0.7         | 109.57    | 178.02     | 51.32       | 15.21     | 9.9        |

| Genotypes | Abbreviate form | DFF    | FD    | FL   | FW    | NDVI | PH     | SLA    | SPAD  | TF    | YPP   |
|-----------|-----------------|--------|-------|------|-------|------|--------|--------|-------|-------|-------|
| NSR-11    | G69             | 92.82  | 39.99 | 4    | 9.61  | 0.47 | 117.07 | 139.01 | 25.37 | 15.71 | 11.14 |
| NSR-117   | G70             | 105.82 | 71.23 | 7.12 | 9.39  | 0.63 | 110.57 | 129.4  | 50.02 | 13.21 | 8.59  |
| NSR-13    | G71             | 92.82  | 66.13 | 6.61 | 12.6  | 0.66 | 105.07 | 125.84 | 42.3  | 16.71 | 12.85 |
| NSR-17    | G72             | 102.07 | 46.33 | 4.63 | 8.51  | 0.62 | 97.82  | 113.3  | 53.69 | 13.21 | 5.23  |
| NSR-26    | G73             | 98.07  | 32.33 | 3.23 | 5.31  | 0.52 | 125.82 | 193.64 | 49.26 | 14.21 | 4.65  |
| NSR-27    | G74             | 103.07 | 51.44 | 5.14 | 7.33  | 0.54 | 106.82 | 176.19 | 40.19 | 14.21 | 6.97  |
| NSR-28    | G75             | 104.07 | 55.16 | 5.52 | 8.75  | 0.63 | 110.82 | 107.69 | 51.27 | 15.21 | 7.61  |
| NSR-53    | G76             | 109.07 | 50.27 | 5.03 | 13.18 | 0.51 | 118.82 | 132.25 | 43.79 | 14.21 | 8.12  |
| NTR-23    | G77             | 103.82 | 31.36 | 3.14 | 6.87  | 0.78 | 121.57 | 168.62 | 61.54 | 16.21 | 9.71  |
| NTR-7     | G78             | 101.82 | 48.97 | 4.9  | 7.61  | 0.53 | 118.57 | 99.18  | 39.91 | 10.21 | 3.64  |
| Potia-1   | G79             | 97.07  | 23.09 | 2.31 | 4.07  | 0.65 | 131.32 | 133.74 | 49.89 | 12.96 | 5.89  |
| Potia-2   | G80             | 97.07  | 23.37 | 2.34 | 3.37  | 0.54 | 126.32 | 146.7  | 50.66 | 13.96 | 5.88  |
| SU-1      | G81             | 109.07 | 68.3  | 6.83 | 11.35 | 0.43 | 128.82 | 91.57  | 27.21 | 14.21 | 6.72  |
| SU-169    | G82             | 97.82  | 81.44 | 8.14 | 13.82 | 0.65 | 100.57 | 186.23 | 48.45 | 49.21 | 0.24  |
| SU-184    | G83             | 99.82  | 89.67 | 8.97 | 13.38 | 0.64 | 103.57 | 204.28 | 44.07 | 49.21 | 0.24  |
| SU-185    | G84             | 97.82  | 89.38 | 8.94 | 12.61 | 0.64 | 121.57 | 98.2   | 51.45 | 15.21 | 7.61  |
| SU-193    | G85             | 109.07 | 45.23 | 4.52 | 8.76  | 0.56 | 103.82 | 127.19 | 40.63 | 12.21 | 6.1   |
| SU-194    | G86             | 96.82  | 52.47 | 5.25 | 8.9   | 0.65 | 100.57 | 165.81 | 45.68 | 12.21 | 4.99  |
| SU-195    | G87             | 95.82  | 45.37 | 4.54 | 5.55  | 0.72 | 110.57 | 138.26 | 61.61 | 10.21 | 2.87  |
| SU-196    | G88             | 99.82  | 78.77 | 7.88 | 9.66  | 0.59 | 126.57 | 111.3  | 37.79 | 12.21 | 8.61  |
| SU-197    | G89             | 96.82  | 65.92 | 6.59 | 10.87 | 0.65 | 138.07 | 201.46 | 47.47 | 13.71 | 7.67  |
| SU-198    | G90             | 98.82  | 82.94 | 8.29 | 4.29  | 0.59 | 109.07 | 221.66 | 44.73 | 48.71 | 4.87  |
| SU-199    | G91             | 97.82  | 57.25 | 5.72 | 8.98  | 0.47 | 119.07 | 99.28  | 48.71 | 13.71 | 7.07  |
| SU-200    | G92             | 95.82  | 29.93 | 2.99 | 5.72  | 0.59 | 115.07 | 163.93 | 40.53 | 11.71 | 6.71  |
| SU-201    | G93             | 92.82  | 85.72 | 8.57 | 11.79 | 0.51 | 99.07  | 168.3  | 47.73 | 11.71 | 6.37  |
| SU-202    | G94             | 96.82  | 44.34 | 4.43 | 9.72  | 0.42 | 132.07 | 113.91 | 34.89 | 13.71 | 6.26  |
| SU-203    | G95             | 95.82  | 37.76 | 3.78 | 6.41  | 0.45 | 119.07 | 182.4  | 54.97 | 48.71 | 0.87  |
| SU-204    | G96             | 97.82  | 74.91 | 7.49 | 12.69 | 0.52 | 93.07  | 121.69 | 39.04 | 48.71 | 0.87  |
| SU-205    | G97             | 99.82  | 62.13 | 6.21 | 9.71  | 0.44 | 122.07 | 99.3   | 49.19 | 10.71 | 5.92  |
| SU-206    | G98             | 97.82  | 94.73 | 9.47 | 11.89 | 0.44 | 109.07 | 164.18 | 48.77 | 10.71 | 5.73  |
| SU-207    | G99             | 97.82  | 10.71 | 1.07 | 0.87  | 0.59 | 99.07  | 194.92 | 34.95 | 48.71 | 0.87  |
| SU-208    | G100            | 96.82  | 7.71  | 0.77 | 1.07  | 0.67 | 98.07  | 175.52 | 38.58 | 48.71 | 0.87  |
| SU-209    | G101            | 94.82  | 74.16 | 7.42 | 9.8   | 0.48 | 97.07  | 103.27 | 40.89 | 48.71 | 0.87  |
| SU-210    | G102            | 96.82  | 38.77 | 3.88 | 9.6   | 0.63 | 95.07  | 140.42 | 59.53 | 12.71 | 7.04  |
| SU-211    | G103            | 104.82 | 45.97 | 4.6  | 11.89 | 0.49 | 97.07  | 88.26  | 48.22 | 11.71 | 7.77  |

| <b>Genotypes</b> | <b>Abbreviate form</b> | <b>DFF</b> | <b>FD</b> | <b>FL</b> | <b>FW</b> | <b>NDVI</b> | <b>PH</b> | <b>SLA</b> | <b>SPAD</b> | <b>TF</b> | <b>YPP</b> |
|------------------|------------------------|------------|-----------|-----------|-----------|-------------|-----------|------------|-------------|-----------|------------|
| SU-212           | G104                   | 102.07     | 55.45     | 5.54      | 8.04      | 0.6         | 119.82    | 100.45     | 43.19       | 13.21     | 6.88       |
| SU-213           | G105                   | 86.57      | 66.35     | 6.63      | 8.9       | 0.47        | 109.82    | 141.39     | 47.75       | 13.71     | 7.46       |
| SU-214           | G106                   | 85.57      | 68.94     | 6.89      | 8.3       | 0.58        | 116.82    | 188.58     | 50.55       | 13.71     | 6.13       |
| SU-215           | G107                   | 89.57      | 48.93     | 4.89      | 8.28      | 0.47        | 114.82    | 111.34     | 57.47       | 13.71     | 6.56       |
| SU-216           | G108                   | 92.57      | 41.12     | 4.11      | 7.7       | 0.59        | 135.82    | 99.28      | 47.13       | 15.71     | 6.86       |
| SU-217           | G109                   | 95.07      | 40.07     | 4.01      | 5.87      | 0.56        | 105.32    | 213.07     | 52.69       | 11.96     | 5.46       |
| SU-218           | G110                   | 99.32      | 32.18     | 3.22      | 6.26      | 0.55        | 110.82    | 201.1      | 51.14       | 12.96     | 5.32       |
| SU-219           | G111                   | 99.32      | 36.11     | 3.61      | 7.32      | 0.5         | 99.82     | 173.87     | 54.73       | 13.96     | 6.25       |
| SU-220           | G112                   | 101.32     | 24.04     | 2.4       | 4.6       | 0.59        | 115.82    | 185.8      | 64.98       | 12.96     | 4          |
| SU-221           | G113                   | 101.32     | 31.35     | 3.13      | 6.4       | 0.38        | 95.82     | 169.94     | 39.28       | 15.96     | 5.92       |
| SU-222           | G114                   | 102.32     | 24.53     | 2.45      | 5.4       | 0.52        | 125.82    | 111.6      | 43.7        | 14.96     | 4.1        |
| SU-223           | G115                   | 102.32     | 32        | 3.2       | 6.21      | 0.44        | 104.82    | 170.12     | 53.17       | 12.96     | 5.39       |
| SU-224           | G116                   | 99.32      | 48.13     | 4.81      | 7.19      | 0.57        | 110.82    | 105.19     | 47.69       | 12.96     | 6.18       |
| SU-225           | G117                   | 99.32      | 54.05     | 5.4       | 9.91      | 0.48        | 119.82    | 132.08     | 49.91       | 13.96     | 7.48       |
| SU-226           | G118                   | 98.32      | 41.21     | 4.12      | 8.6       | 0.47        | 110.82    | 117.64     | 56.38       | 14.96     | 7.07       |
| SU-227           | G119                   | 92.07      | 23.95     | 2.4       | 4.37      | 0.5         | 109.32    | 220.95     | 52.7        | 12.96     | 6.78       |
| SU-228           | G120                   | 96.32      | 41.96     | 4.2       | 6.3       | 0.59        | 124.82    | 93.7       | 52.24       | 21.96     | 8.36       |
| SU-229           | G121                   | 91.07      | 37.34     | 3.73      | 4.95      | 0.68        | 104.32    | 139.83     | 61.57       | 11.96     | 5.42       |
| SU-230           | G122                   | 97.32      | 27.07     | 2.71      | 5.01      | 0.47        | 131.82    | 242.85     | 47.74       | 12.96     | 3.78       |
| SU-231           | G123                   | 95.07      | 23.14     | 2.31      | 4.68      | 0.52        | 111.32    | 121.36     | 41.85       | 11.96     | 5.84       |
| SU-232           | G124                   | 99.32      | 48.65     | 4.86      | 8.3       | 0.5         | 120.82    | 134.51     | 43.16       | 12.96     | 5.43       |
| SU-233           | G125                   | 95.07      | 27.2      | 2.72      | 5.96      | 0.52        | 109.32    | 133.92     | 45.23       | 21.96     | 11.51      |
| SU-234           | G126                   | 97.07      | 61.56     | 6.16      | 5.99      | 0.53        | 109.32    | 178.61     | 52.17       | 12.96     | 6.89       |
| SU-235           | G127                   | 97.07      | 40.5      | 4.05      | 4.87      | 0.58        | 114.32    | 132.18     | 44.45       | 12.96     | 7.73       |
| SU-38            | G128                   | 109.82     | 62.47     | 6.25      | 8.98      | 0.57        | 104.57    | 107.35     | 38.55       | 12.21     | 7.04       |
| SU-39            | G129                   | 91.82      | 70.5      | 7.05      | 7.46      | 0.58        | 100.57    | 86.12      | 47.21       | 18.21     | 9.22       |
| SU-43            | G130                   | 89.82      | 82.55     | 8.26      | 9.78      | 0.71        | 93.57     | 97.69      | 58.46       | 49.21     | 0.24       |
